# Supplementary material for: FaesAP3_1 Regulates the FaesELF3 Gene Involved in Filament-Length Determination of Long-Homostyle Fagopyrum esculentum
Source: MDPI journal article supplement (doi:10.3390/ijms232214403), 2022-11-19
Supplement: s1 [file s1]

## Supplementary Materials

**Table S1.** Primers used in this study.

| Primer name     | Primers sequences (5'-3')                             |
|-----------------|-------------------------------------------------------|
| 3RELF3GSP       | GGGATGAGTTTATCCGACAATTC                               |
| 5RELF3GSP1      | TGAATGTGATGCCAGAG                                     |
| 5RELF3GSP2      | GCTACTCCCCTGACTTGCTCCACTATGCTGAT                      |
| 5RELF3GSP3      | TGGGTTGTGCCGATTGAAGG                                  |
| DpELF3SP1       | TCCCCTGACTTGCTCCACTATGC                               |
| DpELF3SP2       | GCCGATTTGAAGGGATAGTAAGTTGC                            |
| DpELF3SP3       | CCATGGACTTCTCCTCGTATTTAC                              |
| DpELF3SP4       | GATGGACACAAACCCAATAGACCCA                             |
| DpELF3SP5       | GGGGTTAGAAAGAAGATTGGGGTTG                             |
| DpELF3SP6       | AAGGAAAGTGCTATGAGTTGTGGGC                             |
| TpFaesELF3F1    | ATGATTACGAATTC <u>GAGCT</u> CCGATCAACTAGTTATTTTT      |
| TpFaesELF3F2    | ATGATTACGAATTC <u>GAGCT</u> CCAATCAAACCTTAATAATCGAA   |
| TpFaesELF3F3    | ATGATTACGAATTC <u>GAGCT</u> CCTATTCCGTATCTTGTAGTTG    |
| TpFaesELF3R     | TCTGCAGGTCGACT <u>CTAGACT</u> CTTATTTCAAAATTTTCAACC   |
| Y1HpFaesELF3F   | AAGCTTGAATTC <u>GAGCT</u> CTCCATTTAGGGAAACAGGA        |
| Y1HpFaesELF3R   | ACATGCCTCGAGGTCGACCTCTTATTTCAAAATTTTC                 |
| Y1HFaesAP3_1F   | ATGGAGGCCAGTGAATTCCTGCTAAGAACAACAAGTAACA              |
| Y1HFaesAP3_1R   | ATTCATCTGCAGCTC <u>GAGCT</u> CGAACACATGAACACAATGAG    |
| Y1HFaesAP3_2F   | ATGGAGGCCAGTGAATTCATGTTACAGAGCCAATTACGA               |
| Y1HFaesAP3_2R   | ATTCATCTGCAGCTC <u>GAGCT</u> CATATACAATCGGAGACAC      |
| Y1HFaesPIF      | ATGGAGGCCAGTGAATTCATGGGGAGAGGGAAGATTG                 |
| Y1HFaesPIR      | ATTCATCTGCAGCTC <u>GAGCT</u> CTAGGGTTTTTGTCTTGCTAC    |
| Y1HFaesAGF      | ATGGAGGCCAGTGAATTCCTTTTTAGTTTCTTCTCCCAG               |
| Y1HFaesAGR      | ATTCATCTGCAGCTC <u>GAGCT</u> CTACAACACAGCTTCTCAAC     |
| Dual-pFaesELF3F | GGGCCCCCCTCGAGGTCGACCAATCAAACCTTAATAATCG              |
| Dual-pFaesELF3R | CAGGAATTCGATATC <u>AAGCTT</u> CTCTTATTTCAAAATTTTCAACC |
| Dual-FaesAP3_1F | CGCGGTGGCGGCCGCTCTAGATGCTAAGAACAACAAGTAACA            |
| Dual-FaesAP3_1R | AAGCTTGATATCGAATTCGAACACATGAACACAATGAG                |
| qFaesELF3F      | CGGAAAGAGGAGGGCCAAGAG                                 |
| qFaesELF3R      | GACGCGTATTTCTGGGTGT                                   |
| qFaesAP3_1F     | AACCAACAGACAAGTTACTTATT                               |
| qFaesAP3_1R     | ACATCCTGCCAGAACTCC                                    |
| qFaesactinF     | ACCTTGCTGGACGTGACCTTAC                                |
| qFaesactinR     | CCATCAGGAAGCTCATAGTTC                                 |

|                 |                                         |
|-----------------|-----------------------------------------|
| TRV2-FaesELF3F  | GTTACCGAATTCTCTAGAGATGAGTTTATCCGACAATTC |
| TRV2-FaesELF3R  | CTCGAGACGCGTGAGCTCTGTCTTTGAAGTCTATCAGCT |
| TRV2-FaesAP3_1F | GTTACCGAATTCTCTAGACACCTTCCTTACTTCATCTCC |
| TRV2-FaesAP3_1R | CTCGAGACGCGTGAGCTCCTTCATGCATTATACAGGACA |

**Table S2.** Information of sequences selected for alignments and phylogenetic analyses from NCBI GenBank.

| Taxon and species              | Protein name | Accession numbers |
|--------------------------------|--------------|-------------------|
| Poaceae                        |              |                   |
| <i>Oryza sativa</i>            | OsELF3_1     | CAA08804.1        |
|                                | OsELF3_2     | CAA08802.1        |
| <i>Zea mays</i>                | ZmELF3_1     | NP_001169653.1    |
|                                | ZmELF3_2     | PWZ32646.1        |
| <i>Triticum aestivum</i>       | TaELF3_1DL   | ABL11477.1        |
| <i>Hordeum vulgare</i>         | HvELF3       | AEZ53982.1        |
| <i>Brachypodium distachyon</i> | BdELF3       | XP_003567779.1    |
| <i>Setaria viridis</i>         | SvELF3a      | TKW15056.1        |
|                                | SvELF3b      | TKW25484.1        |
| Ranunculaceae                  |              |                   |
| <i>Paeonia suffruticosa</i>    | PsELF3       | QJP03923.1        |
| Fabaceae                       |              |                   |
| <i>Cicer arietinum</i>         | CaELF3a      | XP_004501482.1    |
|                                | CaELF3b      | XP_004498926.1    |
| <i>Lens culinaris</i>          | LcELF3       | AFZ78447.1        |
| <i>Pisum sativum</i>           | PsELF3a      | AFR60580.1        |
| <i>Glycine max</i>             | GmELF3a      | AQX44338.1        |
|                                | GmELF3b_1    | AQX44344.1        |
|                                | GmELF3b_2    | XP_003550290.1    |
| Malvaceae                      |              |                   |
| <i>Gossypium hirsutum</i>      | GhELF3       | XP_016744799.2    |
| Brassicaceae                   |              |                   |
| <i>Arabidopsis thaliana</i>    | AtELF3       | AAX23847.1        |
| <i>Brassica rapa</i>           | BrELF3       | AEB33726.1        |
| Polygonaceae                   |              |                   |
| <i>Fagopyrum esculentum</i>    | S-ELF3       | BAL45488.1        |
|                                | FaesELF3     | OP572281.1        |

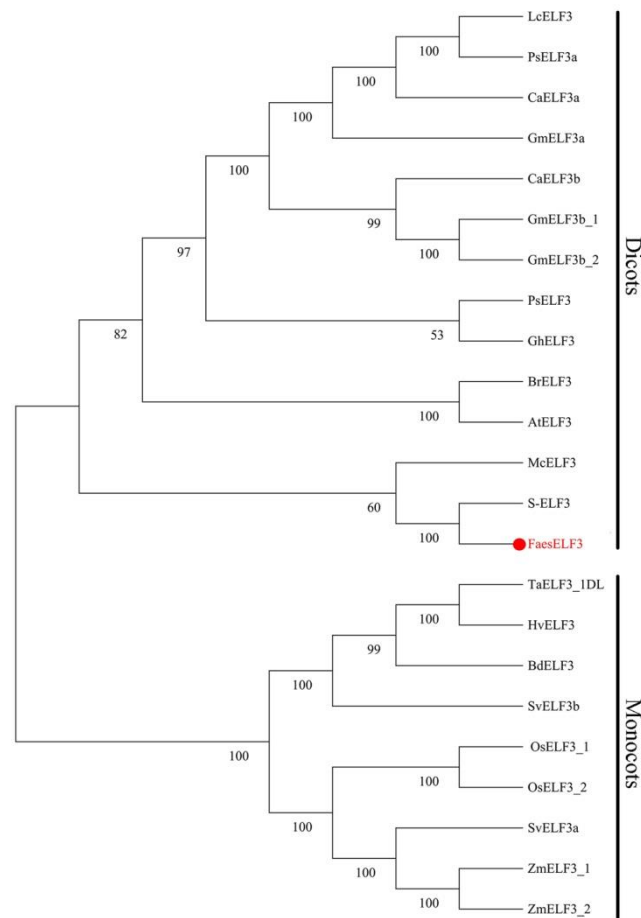

Supplementary Figure S1. Phylogenetic tree of FaesELF3 and other ELF3 homologous proteins from different species.

> *pFaesELF3*

-1278 CGATCAACTA GTTATTTTTG CTACTCAATA AGCTTAGGTT ATCGATAAAC TTTATATGCG  
TATABOX5 CAATBOX1

-1218 ACCAGTAAAC ACAAGGTTTC CAAACGTACC CTCAAACATC AATTTCATAA AACACACTCA  
DPBFCOREDCDC3 ACGTATERD1 CAATBOX1

-1158 AATTCCACAG CTTTCAAAAA TTATATTTGG TATATAAACA CTAATTAATA TCACAAACAC  
TATABOX4

-1098 AATATAATGT TACACACGAG AGGTGTTTCG TCCCAAATTA GTATAAAAAA TCAGTGTGAA  
CArG-box DPBFCOREDCDC3 GTGANTG10

-1038 AATGAATATT TTTTTTATCT TATACCTTTT TTCGTTATAT AAATAAAGGT TGGTGAATA  
PYRIMIDINEBOXOSRAMY1A TATABOX4

-978 CATAATAACA TAAGTGCAAG ACCCTCGACA TCTATTTTTT ATACATTAAA TTTATCCTTA

-918 AAAATTGAAA TATTTCAATG CAAATATCAA TCAAACCTTT AATAATCGAA TCAACAAAGA  
CAATBOX1 CAATBOX1 AACAAA motif

-858 ACTCGTACTT AAACCGAATC TCTTGTAAC CGATTAGTTT AGGTTGAAAA GTGACACAAG

GTGANTG10

CAATBOX1 MYCCONSUSAT

+523    TGTGCC**TTTG** **TT**GGATTGTT   AAGAGAGGTT   GAAAATTTTG   AAATAAGAG **ATG**  
TTTGTT motif

**Supplementary Figure S2. *pFaesELF3* promoter sequence.** The transcription start site (+1) is in bold and boxed. The start codon ATG is in bold and boxed. Putative cis-acting regulatory elements are in bold and underlined.
